# Supplementary material
Source: Frontiers journal article supplement (https://www.frontiersin.org/articles/485881)
Supplement: Data_Sheet_1.PDF [file Data_Sheet_1.PDF]

# Supplementary Material

## 1 SUPPLEMENTARY FIGURES

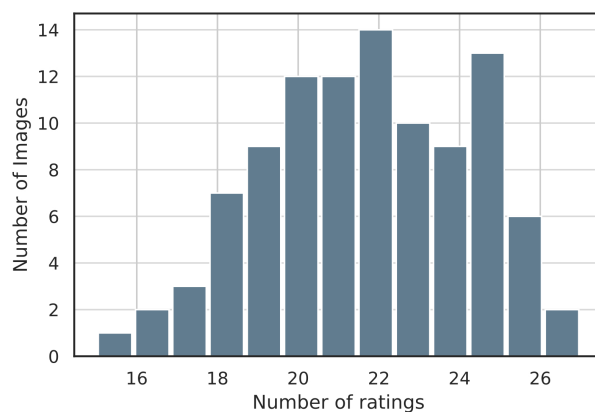

**Figure S1.** Distribution of images as a function of the number of ratings (mean of  $21.76 \pm 2.75$ , range 15 to 27)

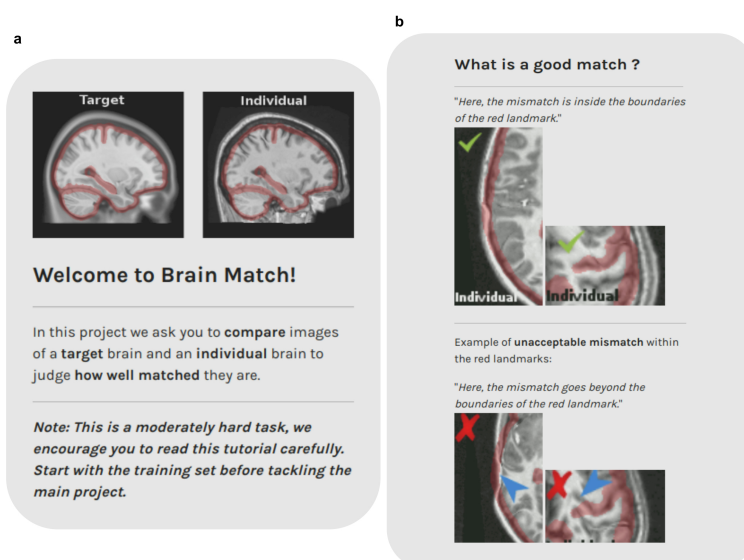

**Figure S2. a:** A tutorial popup when first accessing the brain match interface showing the main goal of the task. **b:** A panel of annotated examples of what is a good and bad match between highlighted brain area. More examples follows on how to tag images and how to decide the final rating of each image (for more detailed tutorial visit <https://www.zooniverse.org/projects/simexp/brain-match>)
